# Supplementary material
Source: PubMed Central journal article supplement (PMC8279456)
Supplement: NIHMS1719569-supplement-Supplemental_table_2.pdf [file NIHMS1719569-supplement-Supplemental_table_2.pdf]

**Supplemental Table 2: Candidate genes and RNAi lines used in Dia-interacting protein screen.**

**Supplemental Table 2: Dia-interacting Protein Screen**

| Gene/stock number         | Gal4                  | Phenotype                        | Enhanced dia-RNAi phenotype? |
|---------------------------|-----------------------|----------------------------------|------------------------------|
| cpb/Trip26298 (III)       | UAS-dicer;;Dmef2-Gal4 | wt                               | -                            |
| Cpa/Trip31124 (III)       | UAS-dicer;;Dmef2-Gal4 | wt                               | -                            |
| abi/Trip36707 (III)       | UAS-dicer;;Dmef2-Gal4 | wt                               | -                            |
| chic/Trip34523 (III)      | UAS-dicer;;Dmef2-Gal4 | wt                               | Pupae lethal                 |
| plcPH::GFP                | 2x Dmef2-Gal4         | wt                               | -                            |
| rho/VDRC 107502           | UAS-dicer;;Dmef2-Gal4 | pupae lethal                     | N/A                          |
|                           | Dmef2-Gal4            | wt                               | -                            |
| mwh/Trip34862 (III)       | UAS-dicer;;Dmef2-Gal4 | wt                               | -                            |
| Ena/TRiP31582 (III)       | UAS-dicer;;Dmef2-Gal4 | flightless                       | -                            |
| cib/Trip 36630 (III)      | UAS-dicer;;Dmef2-Gal4 | Pupae lethal                     | -                            |
| cip4/Trip31646 (III)      | UAS-dicer;;Dmef2-Gal4 | wt                               | -                            |
| gel/Trip 31205 (III)      | UAS-dicer;;Dmef2-Gal4 | wt                               | -                            |
| flii/VDRC 39528 (III)     | UAS-dicer;;Dmef2-Gal4 | flightless                       | Pupae lethal                 |
| tsr/VDRC (II)             | MHC-Gal4              | wt                               | -                            |
| CG5869/Trip 51452 (II)    | UAS-dicer;;Dmef2-Gal4 | wt                               | -                            |
| CG6873/TRiP 38226 (II)    | UAS-dicer;;Dmef2-Gal4 | wt                               | -                            |
| qua/TRiP 41856 (III)      | UAS-dicer;;Dmef2-Gal4 | wt                               | -                            |
| abp1/TRiP 38282 (II)      | UAS-dicer;;Dmef2-Gal4 | wt                               | -                            |
| twf/TRiP 35365 (III)      | UAS-dicer;;Dmef2-Gal4 | wt                               | -                            |
| CG45186 /TRiP 31579 (III) | UAS-dicer;;Dmef2-Gal4 | flightless                       | -                            |
| CG45186 /TRiP 28914 (III) | UAS-dicer;;Dmef2-Gal4 | Pupae lethal/ flightless         | -                            |
| CG45186 /TRiP 34016 (III) | UAS-dicer;;Dmef2-Gal4 | wt                               | -                            |
| obscurin /Trip34000 (III) | UAS-dicer;;Dmef2-Gal4 | wt                               | -                            |
| zormin/VDRC 34513 (II)    | UAS-dicer;;Dmef2-Gal4 | Pupae semi-lethal/<br>flightless | -                            |
| msp300/VDRC 109023 (II)   | UAS-dicer;;Dmef2-Gal4 | Embryo /Larva lethal             | N/A                          |
| msp300/VDRC 107183 (II)   | UAS-dicer;;Dmef2-Gal4 | Pupae lethal                     | N/A                          |
|                           | Dmef2-Gal4            | wt                               | -                            |
| lasp/VDRC 109416 (II)     | UAS-dicer;;Dmef2-Gal4 | Pupae lethal                     | N/A                          |
|                           | Dmef2-Gal4            | wt                               | -                            |
| myo/VDRC 110195 (II)      | UAS-dicer;;Dmef2-Gal4 | wt                               | -                            |
| a-Actn/VDRC 110719 (II)   | UAS-dicer;;Dmef2-Gal4 | Larva/ Pupae lethal              | N/A                          |
|                           | DMef2-Gal4            | wt                               | -                            |
| actn3/VDRC 106162 (II)    | UAS-dicer;;Dmef2-Gal4 | Wt/ flightless                   | N/A                          |
|                           | DMef2-Gal4            | wt                               | -                            |
| sls/VDRC 20755 (X)        | UAS-dicer;;Dmef2-Gal4 | Larva lethal                     | N/A                          |
| sls/VDRC 47298(II)        | UAS-dicer;;Dmef2-Gal4 | Embryo/larva lethal              | N/A                          |
|                           | DMef2-Gal4            | wt                               | -                            |
| sls/VDRC 47301(II)        | UAS-dicer;;Dmef2-Gal4 | Embryo/larva lethal              | N/A                          |
| zasp/VDRC 36563 (II)      | UAS-dicer;;Dmef2-Gal4 | Pupae semi-lethal/wt             | -                            |
| Sals/TRiP 31547 (III)     | UAS-dicer;;Dmef2-Gal4 | pupae lethal                     | -                            |
| Sals/TRiP 31547 (III)     | UAS-dicer;;Dmef2-Gal4 | pupae lethal                     | -                            |
