# Supplementary material
Source: PubMed Central journal article supplement (PMC8279456)

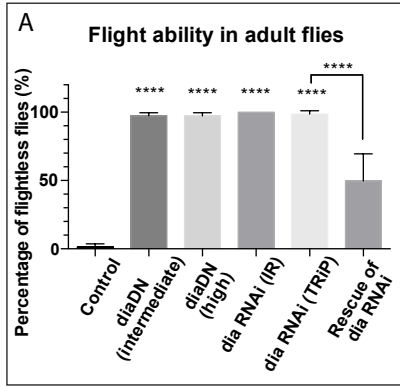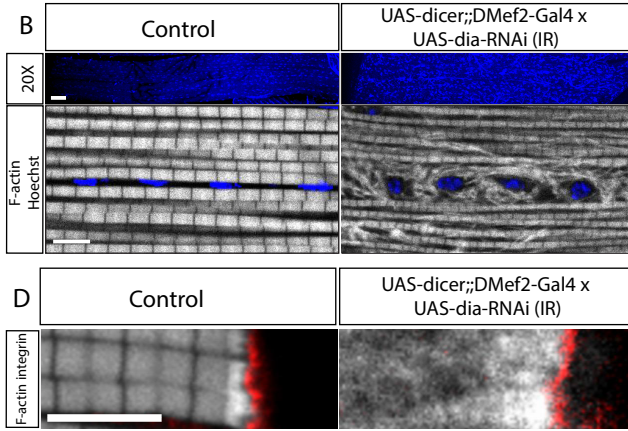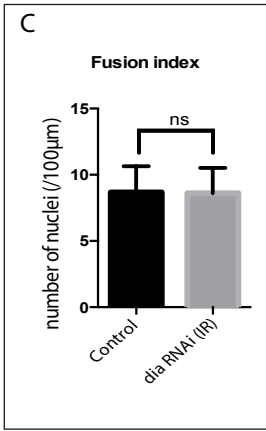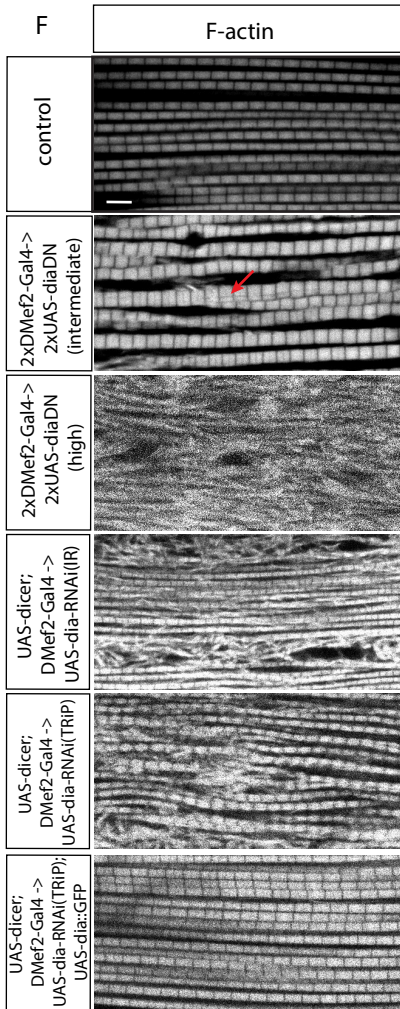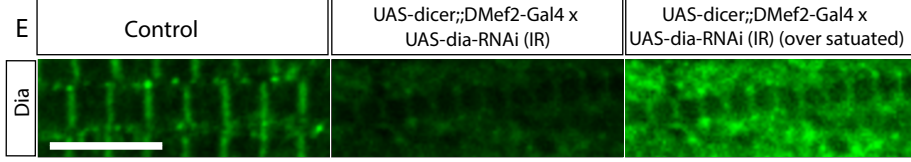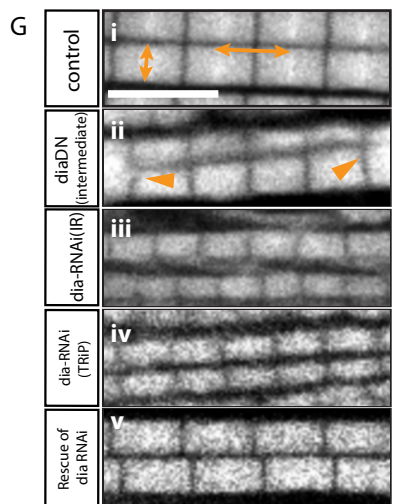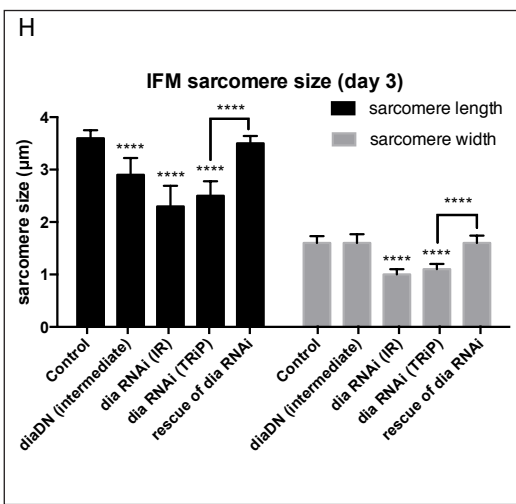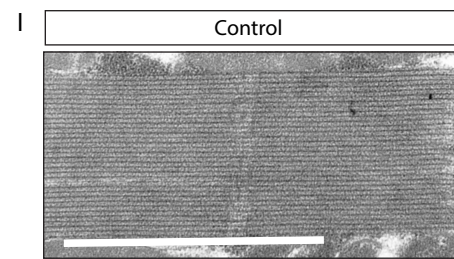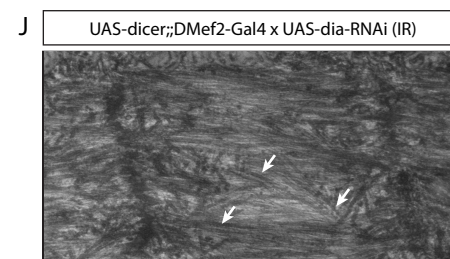

Deng et al. Supplement Figure 1

Supplement: NIHMS1719569-supplement-Supplemental_Figure_1.pdf [file NIHMS1719569-supplement-Supplemental_Figure_1.pdf]

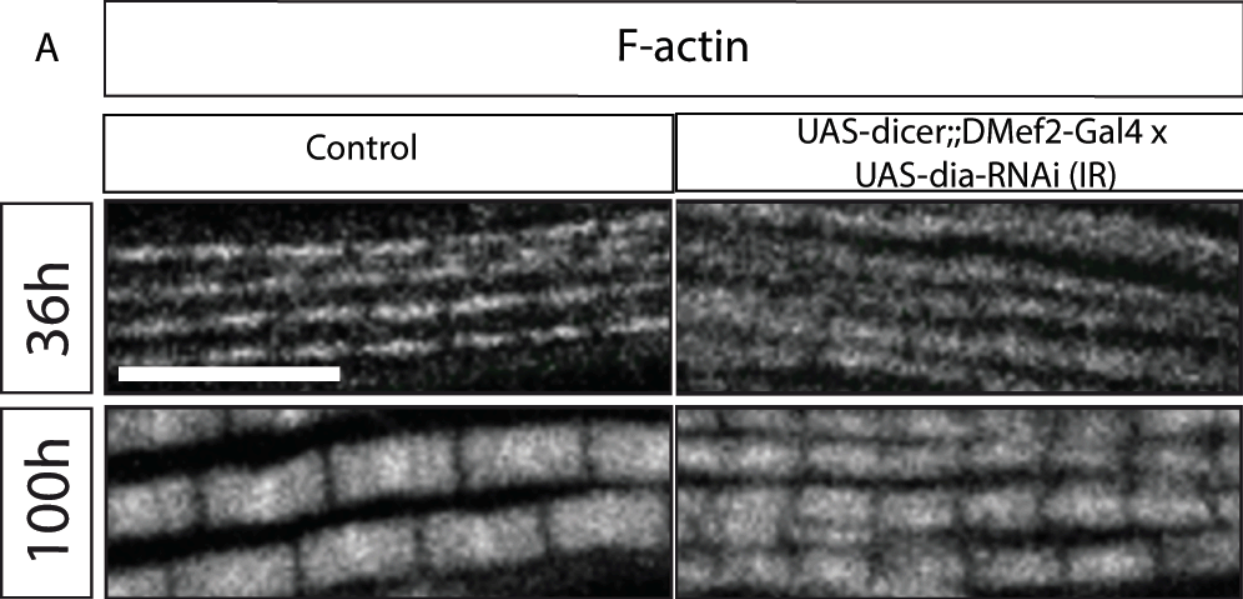

Deng et al. Supplement Figure 2

Supplement: NIHMS1719569-supplement-Supplemental_Figure_2.pdf [file NIHMS1719569-supplement-Supplemental_Figure_2.pdf]

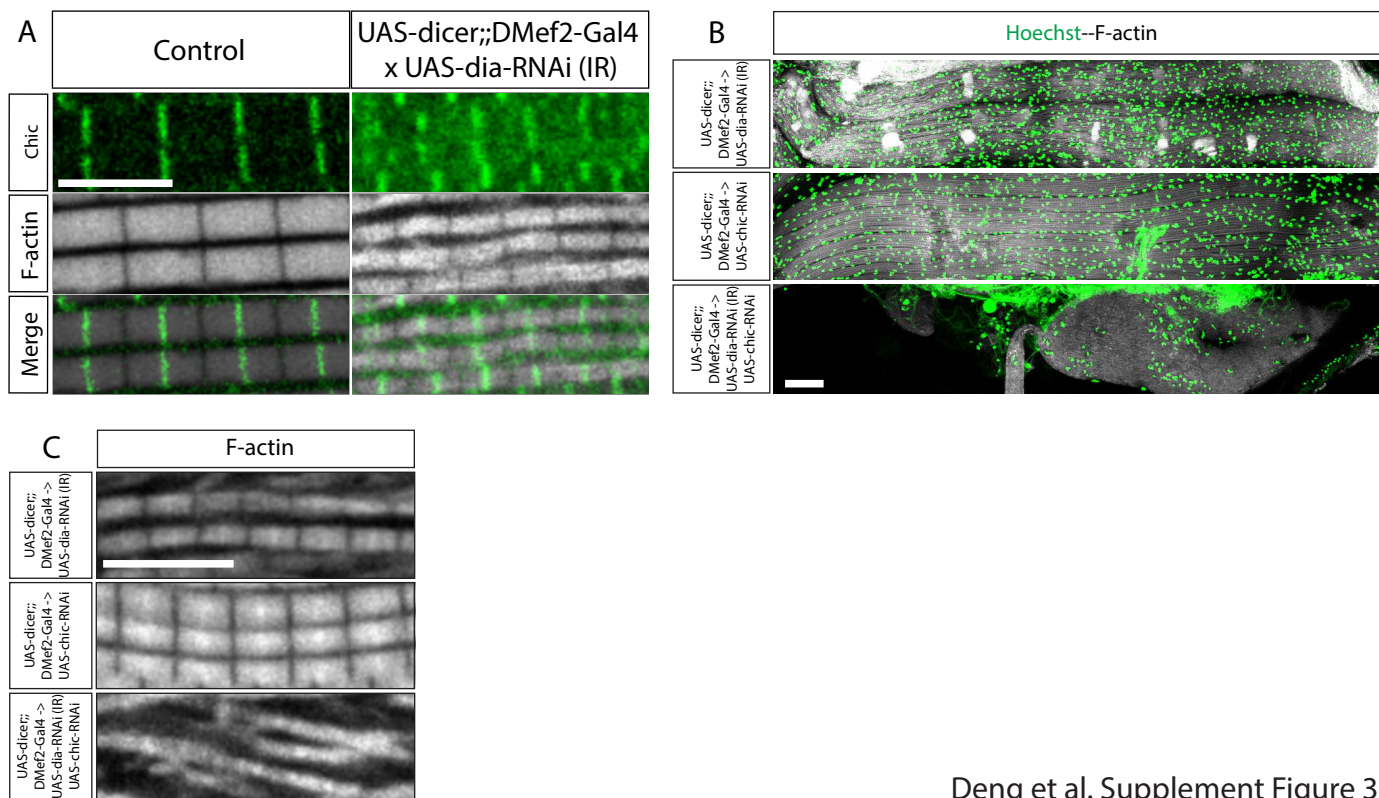

Deng et al. Supplement Figure 3

Supplement: NIHMS1719569-supplement-Supplemental_Figure_3.pdf [file NIHMS1719569-supplement-Supplemental_Figure_3.pdf]

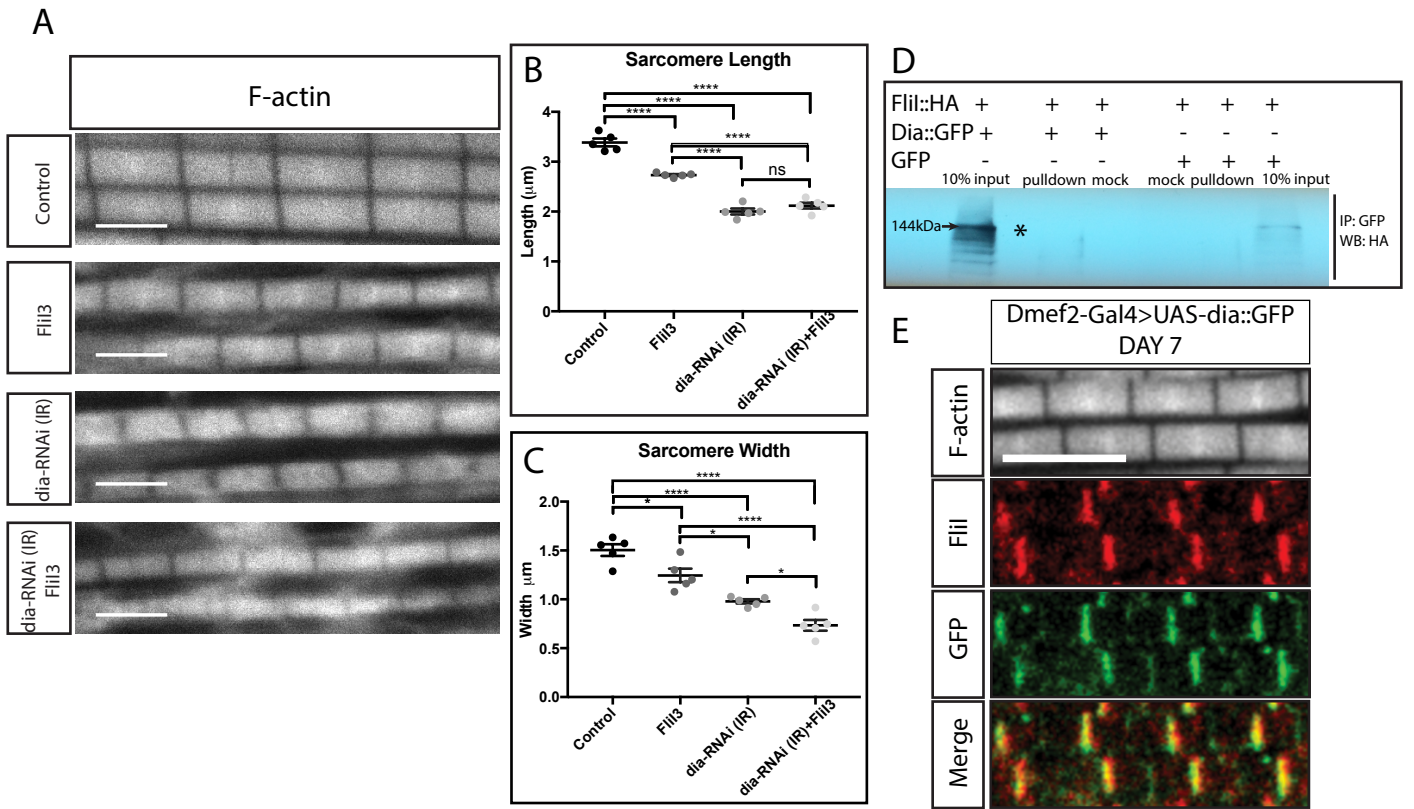

Deng et al. Supplement Figure 4

Supplement: NIHMS1719569-supplement-Supplemental_Figure_4.pdf [file NIHMS1719569-supplement-Supplemental_Figure_4.pdf]

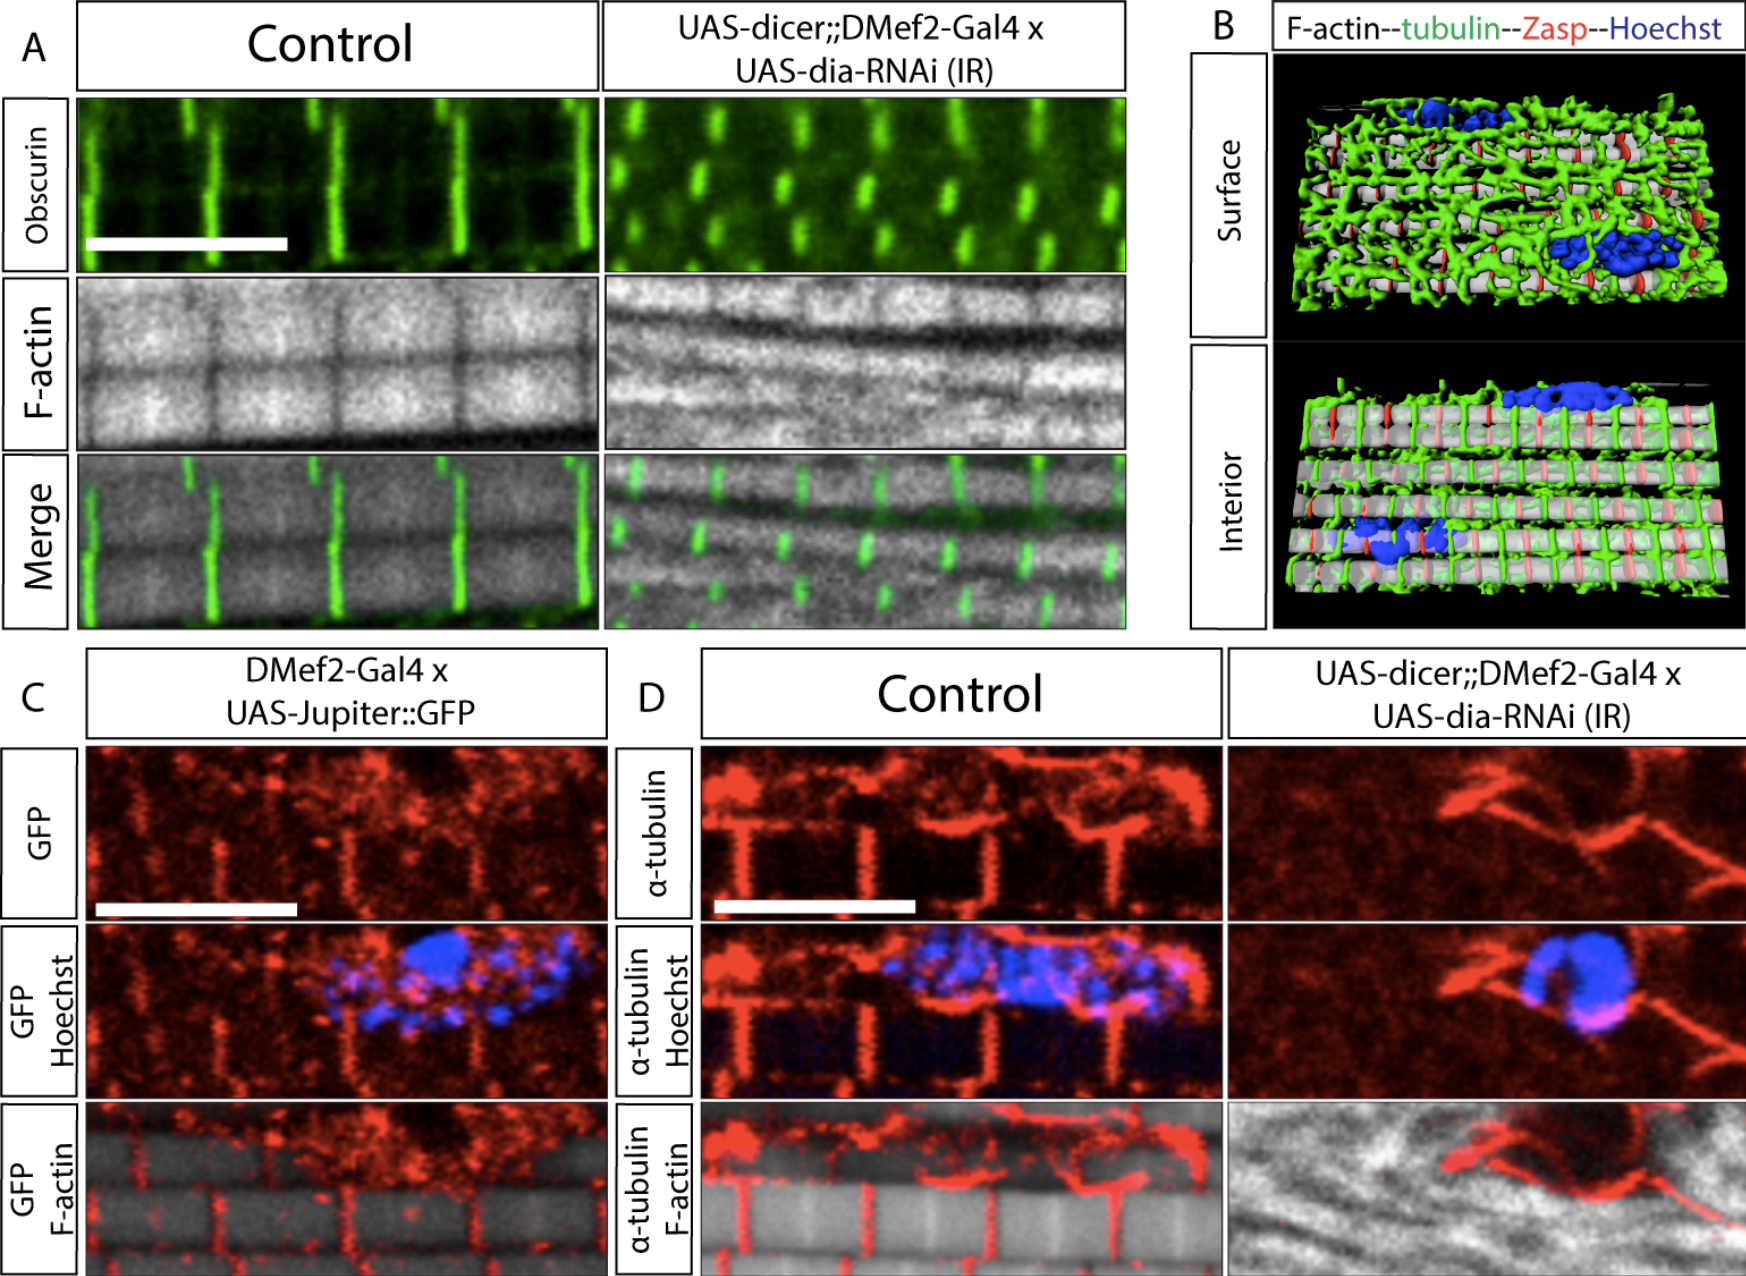

Deng et al. Supplement Figure 5

Supplement: NIHMS1719569-supplement-Supplemental_Figure_5.pdf [file NIHMS1719569-supplement-Supplemental_Figure_5.pdf]

**Supplemental Table 1: Flow chart of Dia-interacting protein screen**

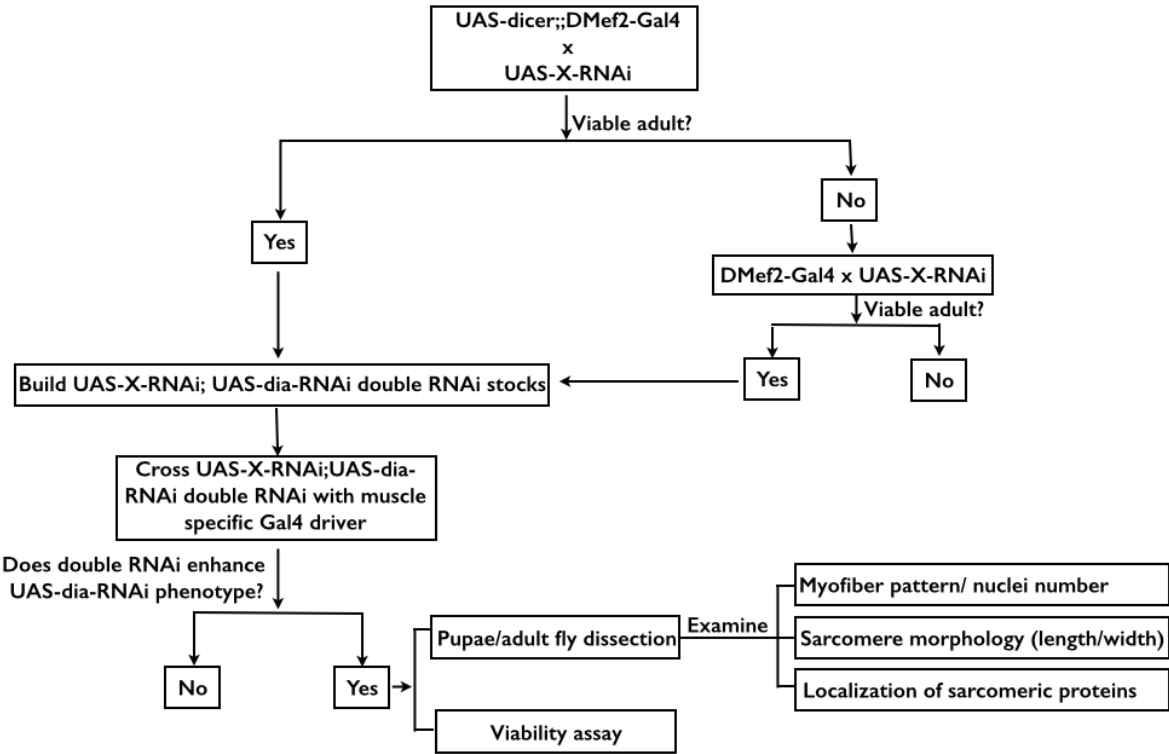

Supplement: NIHMS1719569-supplement-Supplemental_Table_1.pdf [file NIHMS1719569-supplement-Supplemental_Table_1.pdf]
